# Supplementary material for: Association between lifestyle behaviors and body mass index with blood pressure classifications among older adults with hypertension in China
Source: Frontiers journal article supplement (doi:10.3389/fpubh.2025.1610715), 2025-07-03
Supplement: Data_Sheet_1.pdf [file Data_Sheet_1.pdf]

## *Supplementary Material*

### 1 Supplementary Figures and Tables

#### 1.1 Supplementary Figures

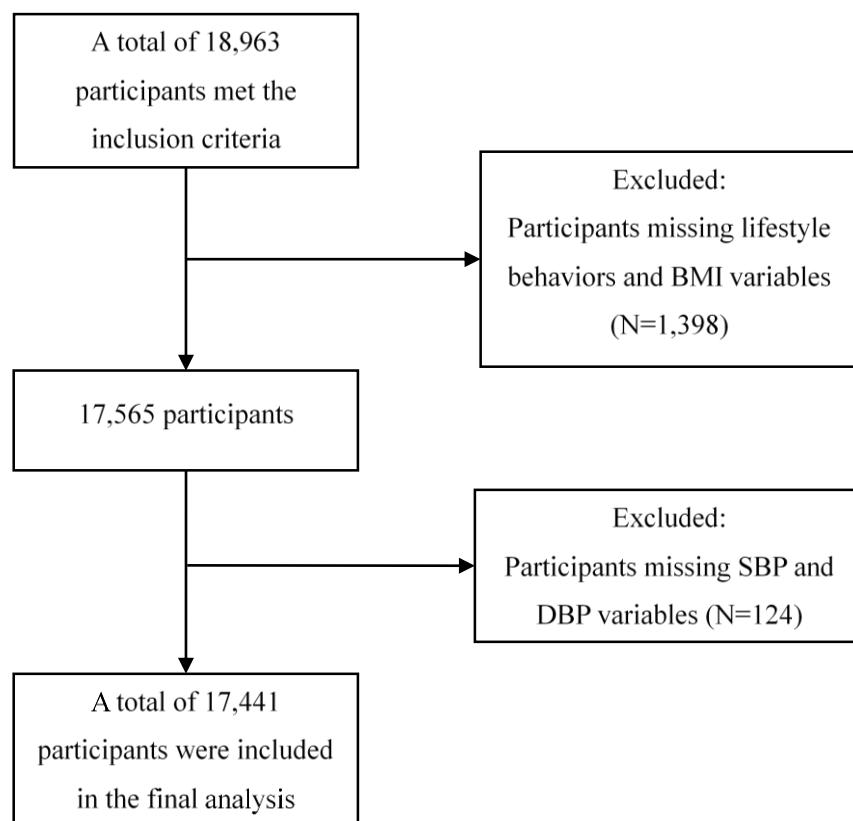

**Supplementary Figure 1.** Inclusion and exclusion of participants. BMI, Body Mass Index; SBP, Systolic Blood Pressure; DBP, Diastolic Blood Pressure.

#### 1.2 Supplementary Tables

**Supplementary Table 1.** Multinomial logistic regression analysis for lifestyle behaviors, Body Mass Index, and blood pressure classifications.

| Characteristics                         | Model1                  |                                 |                                       | Model2                  |                              |                                       |
|-----------------------------------------|-------------------------|---------------------------------|---------------------------------------|-------------------------|------------------------------|---------------------------------------|
|                                         | Normal BP<br>OR (95%CI) | High to normal BP<br>OR (95%CI) | Grade 1<br>hypertension<br>OR (95%CI) | Normal BP<br>OR (95%CI) | High-normal BP<br>OR (95%CI) | Grade 1<br>hypertension<br>OR (95%CI) |
| <b>Age (years)</b>                      | 0.97**(0.96 to 0.98)    | 0.98**(0.97 to 0.99)            | 0.98 ** (0.98 to 0.99)                | 0.97**(0.96 to 0.98)    | 0.98**(0.97 to 0.99)         | 0.98**(0.98 to 0.99)                  |
| <b>Gender</b>                           |                         |                                 |                                       |                         |                              |                                       |
| Female                                  | Ref.                    | Ref.                            | Ref.                                  | Ref.                    | Ref.                         | Ref.                                  |
| Male                                    | 1.37**(1.20 to 1.55)    | 1.36**(1.19 to 1.55)            | 1.24**(1.10 to 1.39)                  | 1.34**(1.18 to 1.52)    | 1.34**(1.18 to 1.53)         | 1.23*(1.09 to 1.38)                   |
| <b>Education</b>                        |                         |                                 |                                       |                         |                              |                                       |
| High school or above                    | Ref.                    | Ref.                            | Ref.                                  | Ref.                    | Ref.                         | Ref.                                  |
| Middle school                           | 0.84 (0.65 to 1.08)     | 0.95 (0.73 to 1.24)             | 0.78*(0.61 to 0.99)                   | 0.85 (0.67 to 1.10)     | 0.96 (0.73 to 1.26)          | 0.78*(0.61 to 1.00)                   |
| Primary school or below                 | 0.75*(0.59 to 0.94)     | 0.87 (0.68 to 1.12)             | 0.78*(0.63 to 0.98)                   | 0.75*(0.60 to 0.95)     | 0.88 (0.68 to 1.13)          | 0.79*(0.63 to 0.99)                   |
| <b>Annual household income (yuan)</b>   |                         |                                 |                                       |                         |                              |                                       |
| ≥35,000                                 | Ref.                    | Ref.                            | Ref.                                  | Ref.                    | Ref.                         | Ref.                                  |
| 20,000 to 34,999                        | 0.80 (0.62 to 1.02)     | 0.90(0.69 to 1.17)              | 0.96 (0.75 to 1.22)                   | 0.80 (0.62 to 1.02)     | 0.90 (0.69 to 1.17)          | 0.96 (0.75 to 1.22)                   |
| 10,000 to 19,999                        | 0.56**(0.45 to 0.70)    | 0.68*(0.54 to 0.86)             | 0.83 (0.67 to 1.02)                   | 0.57*(0.46 to 0.71)     | 0.68*(0.54 to 0.87)          | 0.83 (0.67 to 1.02)                   |
| <10,000                                 | 0.66**(0.54 to 0.80)    | 0.81*(0.66 to 1.00)             | 0.93 (0.77 to 1.12)                   | 0.66**(0.54 to 0.80)    | 0.81 *(0.66 to 1.00)         | 0.93 (0.77 to 1.12)                   |
| <b>Taking antihypertensive medicine</b> |                         |                                 |                                       |                         |                              |                                       |
| Yes                                     | —                       | —                               | —                                     | Ref.                    | Ref.                         | Ref.                                  |
| No                                      | —                       | —                               | —                                     | 0.62**(0.55 to 0.70)    | 0.74**(0.66 to 0.84)         | 0.81**(0.73 to 0.90)                  |
| <b>BMI</b>                              |                         |                                 |                                       |                         |                              |                                       |
| Normal                                  | Ref.                    | Ref.                            | Ref.                                  | Ref.                    | Ref.                         | Ref.                                  |
| Underweight                             | 1.23 (0.94 to 1.60)     | 1.16 (0.87 to 1.54)             | 0.77 (0.59 to 1.00)                   | 1.24 (0.95 to 1.62)     | 1.17 (0.88 to 1.56)          | 0.77 (0.59 to 1.01)                   |

**Continued Supplementary Table 1.** Multinomial logistic regression analysis for lifestyle behaviors, Body Mass Index, and blood pressure classifications.

| Characteristics         | Model1                  |                                 |                                       | Model2                  |                              |                                       |
|-------------------------|-------------------------|---------------------------------|---------------------------------------|-------------------------|------------------------------|---------------------------------------|
|                         | Normal BP<br>OR (95%CI) | High to normal BP<br>OR (95%CI) | Grade 1<br>hypertension<br>OR (95%CI) | Normal BP<br>OR (95%CI) | High-normal BP<br>OR (95%CI) | Grade 1<br>hypertension<br>OR (95%CI) |
| Overweight              | 0.83**(0.75 to 0.92)    | 0.96 (0.85 to 1.07)             | 0.93 (0.84 to 1.03)                   | 0.82**(0.74 to 0.91)    | 0.95 (0.85 to 1.06)          | 0.93 (0.84 to 1.02)                   |
| Obesity                 | 0.62**(0.54 to 0.71)    | 0.78**(0.68 to 0.90)            | 0.83*(0.74 to 0.93)                   | 0.61**(0.53 to 0.69)    | 0.77**(0.67 to 0.89)         | 0.82*(0.73 to 0.93)                   |
| <b>Smoking status</b>   |                         |                                 |                                       |                         |                              |                                       |
| Never                   | Ref.                    | Ref.                            | Ref.                                  | Ref.                    | Ref.                         | Ref.                                  |
| Former                  | 0.99 (0.83 to 1.19)     | 1.01 (0.84 to 1.22)             | 0.94 (0.80 to 1.12)                   | 1.00 (0.84 to 1.20)     | 1.02 (0.85 to 1.23)          | 0.95 (0.80 to 1.12)                   |
| Current                 | 1.05 (0.88 to 1.27)     | 0.96 (0.79 to 1.17)             | 0.98 (0.82 to 1.17)                   | 1.06 (0.88 to 1.28)     | 0.97 (0.80 to 1.18)          | 0.99 (0.83 to 1.17)                   |
| <b>Drinking status</b>  |                         |                                 |                                       |                         |                              |                                       |
| Never                   | Ref.                    | Ref.                            | Ref.                                  | Ref.                    | Ref.                         | Ref.                                  |
| Former                  | 1.44*(1.14 to 1.81)     | 1.30*(1.02 to 1.67)             | 1.26*(1.01 to 1.58)                   | 1.45*(1.15 to 1.82)     | 1.31*(1.02 to 1.67)          | 1.26*(1.01 to 1.59)                   |
| Current                 | 1.02 (0.79 to 1.34)     | 1.16 (0.88 to 1.53)             | 1.16 (0.90 to 1.49)                   | 1.05 (0.81 to 1.37)     | 1.18 (0.90 to 1.56)          | 1.17 (0.91 to 1.50)                   |
| <b>Dietary patterns</b> |                         |                                 |                                       |                         |                              |                                       |
| Low-risk                | Ref.                    | Ref.                            | Ref.                                  | Ref.                    | Ref.                         | Ref.                                  |
| High-risk               | 0.72*(0.56 to 0.93)     | 0.69*(0.53 to 0.89)             | 0.74*(0.58 to 0.94)                   | 0.74*(0.57 to 0.95)     | 0.70*(0.54 to 0.90)          | 0.75*(0.59 to 0.95)                   |
| <b>PA levels</b>        |                         |                                 |                                       |                         |                              |                                       |
| High                    | Ref.                    | Ref.                            | Ref.                                  | Ref.                    | Ref.                         | Ref.                                  |
| Moderate                | 1.07 (0.96 to 1.18)     | 0.97 (0.86 to 1.08)             | 0.95 (0.87 to 1.05)                   | 1.06 (0.95 to 1.17)     | 0.96 (0.86 to 1.07)          | 0.95 (0.86 to 1.05)                   |
| Low                     | 0.94 (0.83 to 1.08)     | 0.93 (0.81 to 1.07)             | 0.92 (0.81 to 1.03)                   | 0.92 (0.81 to 1.05)     | 0.92 (0.80 to 1.06)          | 0.91 (0.80 to 1.02)                   |

Take the grade 2 hypertension as the reference group. \**P* value<0.05, \*\**P* value<0.001; BP, blood pressure; BMI, Body Mass Index; PA, physical activity; OR, odds ratio; CI, confidence interval; Model 1, adjusted for age, gender, education, and annual household income; Model 2, adjusted for age, gender, education, annual household income, and taking antihypertensive medicine.

**Supplementary Table 2.** Effect of interactions between lifestyle behaviors and Body Mass Index on blood pressure classifications.

| <b>Variables</b>     | <b>Normal BP</b><br><i>P</i> for interaction | <b>High-normal BP</b><br><i>P</i> for interaction | <b>Grade 1 hypertension</b><br><i>P</i> for interaction |
|----------------------|----------------------------------------------|---------------------------------------------------|---------------------------------------------------------|
| <b>Model 1</b>       |                                              |                                                   |                                                         |
| BMI*Smoking status   | 0.197                                        | 0.984                                             | 0.907                                                   |
| BMI*Drinking status  | <0.000                                       | <0.000                                            | <0.000                                                  |
| BMI*PA levels        | 0.751                                        | 0.615                                             | 0.142                                                   |
| BMI*Dietary patterns | 0.379                                        | 0.052                                             | 0.058                                                   |
| BMI*Sleeping status  | 0.335                                        | 0.785                                             | 0.209                                                   |
| <b>Model 2</b>       |                                              |                                                   |                                                         |
| BMI*Smoking status   | 0.173                                        | 0.954                                             | 0.887                                                   |
| BMI*Drinking status  | <0.000                                       | <0.000                                            | <0.000                                                  |
| BMI*PA levels        | 0.968                                        | 0.471                                             | 0.101                                                   |
| BMI*Dietary patterns | 0.449                                        | 0.062                                             | 0.065                                                   |
| BMI*Sleeping status  | 0.269                                        | 0.715                                             | 0.239                                                   |

BP, blood pressure; BMI, Body Mass Index; PA, physical activity; Model 1, adjusted for age, gender, education, and annual household income; Model 2, adjusted for age, gender, education, annual household income, and taking antihypertensive medicine.

**Supplementary Table 3.** Association of drinking status with the blood pressure classifications stratified by Body Mass Index.

| Characteristics                         | Blood pressure classifications |                              |                                    |
|-----------------------------------------|--------------------------------|------------------------------|------------------------------------|
|                                         | Normal BP<br>OR (95%CI)        | High-normal BP<br>OR (95%CI) | Grade 1 hypertension<br>OR (95%CI) |
| <b>Age (years)</b>                      | 0.97**(0.96 to 0.98)           | 0.98**(0.97 to 0.98)         | 0.98**(0.98 to 0.99)               |
| <b>Gender</b>                           |                                |                              |                                    |
| Female                                  | Ref.                           | Ref.                         | Ref.                               |
| Male                                    | 1.36**(1.22 to 1.51)           | 1.33**(1.19 to 1.49)         | 1.20**(1.09 to 1.33)               |
| <b>Education</b>                        |                                |                              |                                    |
| High school or above                    | Ref.                           | Ref.                         | Ref.                               |
| Middle school                           | 0.85 (0.66 to 1.10)            | 0.96 (0.73 to 1.25)          | 0.78*(0.61 to 1.00)                |
| Primary school or below                 | 0.75*(0.59 to 0.94)            | 0.87 (0.67 to 1.11)          | 0.78*(0.63 to 0.98)                |
| <b>Annual household income (yuan)</b>   |                                |                              |                                    |
| ≥35,000                                 | Ref.                           | Ref.                         | Ref.                               |
| 20,000 to 34,999                        | 0.79 (0.62 to 1.02)            | 0.90 (0.69 to 1.17 )         | 0.96 (0.75 to 1.22)                |
| 10,000 to 19,999                        | 0.56**(0.45 to 0.70)           | 0.68*(0.54 to 0.86)          | 0.83 (0.67 to 1.02)                |
| <10,000                                 | 0.65**(0.54 to 0.79)           | 0.80*(0.65 to 0.98)          | 0.92 (0.76 to 1.11)                |
| <b>Taking antihypertensive medicine</b> |                                |                              |                                    |
| Yes                                     | Ref.                           | Ref.                         | Ref.                               |
| No                                      | 0.62**(0.55 to 0.70)           | 0.74**(0.66 to 0.83)         | 0.82**(0.74 to 0.90)               |
| <b>BMI*Drinking status</b>              |                                |                              |                                    |
| Normal*Never                            | Ref.                           | Ref.                         | Ref.                               |
| Normal*Former                           | 1.38 (0.95 to 2.00)            | 1.13 (0.75 to 1.70)          | 1.29 (0.90 to 1.86)                |
| Normal*Current                          | 1.08 (0.71 to 1.65)            | 1.10 (0.70 to 1.73)          | 1.10 (0.73 to 1.66)                |
| Underweight*Never                       | 1.26 (0.96 to 1.65)            | 1.22 (0.91 to 1.64)          | 0.80 (0.60 to 1.05)                |
| Underweight*Former                      | 1.39 (0.37 to 5.30)            | 0.26 (0.03 to 2.47)          | 0.56 (0.13 to 2.53)                |
| Underweight*Current                     | 0.70 (0.15 to 3.14)            | 0.50 (0.08 to 3.03)          | 0.28 (0.05 to 1.70)                |
| Overweight*Never                        | 0.82**(0.74 to 0.92)           | 0.93 (0.83 to 1.05)          | 0.93 (0.84 to 1.03)                |
| Overweight*Former                       | 1.20 (0.86 to 1.66)            | 1.42*(1.01 to 1.99)          | 1.18 (0.86 to 1.62)                |
| Overweight*Current                      | 0.84 (0.57 to 1.25)            | 1.16 (0.78 to 1.74)          | 0.96 (0.66 to 1.39)                |
| Obesity*Never                           | 0.59**(0.52 to 0.68 )          | 0.76**(0.66 to 0.88)         | 0.81*(0.71 to 0.91)                |
| Obesity*Former                          | 1.01 (0.63 to 1.63)            | 1.01 (0.61 to 1.69)          | 0.94 (0.59 to 1.50)                |
| Obesity*Current                         | 0.74 (0.41 to 1.34)            | 1.05 (0.57 to 1.91)          | 1.50 (0.89 to 2.54)                |

\**P* value<0.05, \*\**P* value<0.001; BP, blood pressure; BMI, Body Mass Index; OR, odds ratio; CI, confidence interval. The model adjusted for age, gender, education, annual household income, and taking antihypertensive medicine.
